# Supplementary material
Source: PubMed Central journal article supplement (PMC3382828)
Supplement: supp_mol.111.077008_Supplemental_Dataproof_revision.pdf [file supp_mol.111.077008_Supplemental_Dataproof_revision.pdf]

Membrane Potential Dependent Inhibition of the Na,K-ATPase by  
*para*-Nitrobenzyltriethylammonium Bromide.

R. Daniel Peluffo and Joshua R. Berlin

Molecular Pharmacology

**Supplemental Data**

- A. Scheme A: Derivation of equations and best fit parameter values for kinetics and steady state distribution of charge
- B. Scheme B: Derivation of equations and best fit parameter values for kinetics and steady state distribution of charge
- C. Comparison of the apparent affinity for *p*NBTEA binding calculated from transient charge movement kinetics and steady state charge distribution
- D. Supplemental Figure 1

The functions fitted to the data for Scheme A and B binding models are derived below. The parameter values providing the best fit to the data for  $V_M$  dependence of charge kinetics (i) and steady state charge distribution (ii) are also shown.

## A. Scheme A: Sequential binding steps

### i. Transient charge movement kinetics

Considering mass balance,

$$[E]_T = [E^\circ] + [E^\bullet] + [E^{\bullet\bullet}] \quad (\text{A1})$$

and the definition:

$$K_{d1} = \frac{1}{K_{d1}} = \frac{[E^{\bullet\bullet}]}{[E^\bullet][Q]} \quad \text{where } [Q] = p\text{NBTEA concentration} \quad (\text{A2})$$

then,

$$\frac{1}{[E]_T} \left( \frac{d[E^\bullet]}{dt} \right) = - \left[ k_2[Q] + k_{-2} \left( 1 + \frac{K_{d1}}{[Q]} \right) \right] \frac{[E^\bullet]}{[E]_T} + k_{-2} \quad (\text{A3a})$$

and

$$\frac{1}{[E]_T} \left( \frac{d[E^{\bullet\bullet}]}{dt} \right) = - \left( k_{-2} + \frac{k_2[Q]}{1 + \frac{K_{d1}}{[Q]}} \right) \frac{[E^{\bullet\bullet}]}{[E]_T} + \frac{k_2[Q]}{1 + \frac{K_{d1}}{[Q]}} \quad (\text{A3b})$$

The time-dependent solution for (A3b)

$$[E^{\bullet\bullet}]_{(t)} = \frac{C_3}{C_2} [E]_T \left[ 1 + \frac{(br + s) \exp(-at) - (ar + s) \exp(-bt)}{(a - b)} \right] \quad (\text{A4})$$

was obtained as described in Peluffo (2004) with

$$a = \frac{C_1 + \sqrt{C_1^2 - 4C_2}}{2}$$

$$b = \frac{C_1 - \sqrt{C_1^2 - 4C_2}}{2}$$

$$C_1 = k_1[Q] + k_{-1} + k_2[Q] + k_{-2}$$

$$C_2 = k_1k_2[Q]^2 + k_1[Q]k_{-2} + k_{-1}k_{-2} \quad (\text{A5})$$

$$C_3 = k_1k_2[Q]^2$$

$$r = 1 - w(C_2/C_3)$$

$$s = (C_2/C_3)(wk_{-2} - vk_2[Q])$$

where  $w$  and  $v$  are also described in the Appendix of Peluffo (2004).

In this case,  $b = k_{\text{tot}}$  so that:

$$k_{\text{tot}} = \frac{1}{2} \left[ (k_1 + k_2)[Q] + k_{-1} + k_{-2} - \sqrt{\left[ (k_1 + k_2)[Q] + k_{-1} + k_{-2} \right]^2 - 4[k_1k_2[Q]^2 + (k_1[Q] + k_{-1})k_{-2}]} \right] \quad (\text{A6})$$

where  $k_x = k_x^0 e^{-\delta_x \lambda_x U}$ ;  $k_{-x} = k_{-x}^0 e^{(1-\delta_x) \lambda_x U}$  for  $x=1,2$ .  $k_x^0$  and  $k_{-x}^0$  are the rate constants at 0 mV.

$$U = FV_M/RT.$$

This equation was used to fit the data in Fig. 1D. The resulting parameters values were

$$k_1^0 = 4,303,000 \pm 493,500 \text{ s}^{-1}\text{M}^{-1}$$

$$k_2^0 = 819,800 \pm 108,200 \text{ s}^{-1}\text{M}^{-1}$$

$$k_{-1}^0 = 442 \pm 26 \text{ s}^{-1}$$

$$k_{-2}^0 = 1,162 \pm 72 \text{ s}^{-1}$$

$$\delta_2 \lambda_2 = 0.28 \pm 0.02 \quad (\lambda_2 = 0.36; \delta_2 = 0.78)$$

$$(1 - \delta_2) \lambda_2 = 0.08 \pm 0.01$$

$$\delta_1 \lambda_1 = 0.25 \pm 0.02 \quad (\lambda_1 = 0.45; \delta_1 = 0.54)$$

$$(1 - \delta_1) \lambda_1 = 0.21 \pm 0.02$$

The curves in Fig. 3A are the solution to this best-fitting function for Scheme A.

## ii. Steady-state charge distribution

In this scheme, the expression for the mobile charge is defined as  $q(V_M;[Q]) = zF[E_{\circ}^{\bullet}]_{ss}$ .

Considering that

$$\frac{[E_{\circ}^{\bullet}]_{ss}}{[E]_{\Gamma}} = \frac{k_1 k_{-2} [Q]}{k_1 k_2 [Q]^2 + k_1 k_{-2} [Q] + k_{-1} k_{-2}} \quad (\text{A7})$$

then:

$$q(V_M;[Q]) = \frac{q_{TOT}}{1 + \frac{K_{d1}}{[Q]} \exp(-\lambda_1 U) + K_{a2} [Q] \exp(-\lambda_2 U)} \quad (\text{A8})$$

where:  $K_{d1} = k_{-1}^0/k_1^0$  and  $K_{a2} = k_2^0/k_{-2}^0$ . Addition of a term defined at the holding potential leads to

$$\Delta q = \frac{q_{TOT}}{1 + \frac{K_{d1}}{[Q]} e^{-\lambda_1 U} + K_{a2} [Q] e^{-\lambda_2 U}} - \frac{q_{TOT}}{1 + \frac{K_{d1}^h}{[Q]} + K_{a2}^h [Q]} \quad (\text{A9})$$

where  $K_x^h$  is the value of  $K_x e^{-\lambda_x U}$  ( $x=1,2$ ) at the holding potential. This equation was used to fit data in Fig. 2A. The resulting parameter values were

$$\begin{aligned} q_{TOT} &= 14.5 \pm 0.4 \text{ fC/pF} \\ K_{d1} &= (7.9 \pm 1.3) * 10^{-6} \text{ M} \\ \lambda_1 &= 0.31 \pm 0.05 \\ K_{a2} &= 3,900 \pm 300 \text{ M}^{-1} \\ \lambda_2 &= 0.70 \pm 0.04 \end{aligned}$$

The curves in Fig. 4A are the solution to this best-fitting function for scheme A.

## B. Scheme B: Two rapid-equilibrium binding reactions separated by a rearrangement step

### i. Transient charge movement kinetics

Considering mass balance,

$$[E]_{\text{T}} = [E^{\circ}] + [E^{\bullet}] + [E^{\circ}] + [E^{\bullet}] \quad (\text{B1})$$

and the definitions:

$$K_{a1} = \frac{[E^{\bullet}]}{[E^{\circ}][Q]}; \quad K_{a2} = \frac{[E^{\bullet}]}{[E^{\circ}][Q]} \quad (\text{B2})$$

replacing (B2) in (B1) and rearranging:

$$[E]_{\text{T}} = \left(1 + \frac{1}{K_{a1}[Q]}\right)[E^{\bullet}] + (1 + K_{a2}[Q])[E^{\circ}] \quad (\text{B3})$$

The reaction scheme yields the following system of differential equations:

$$\begin{cases} \frac{d[E^{\bullet}]}{dt} = -k_2[E^{\bullet}] + k_{-2}[E^{\circ}] \\ \frac{d[E^{\circ}]}{dt} = k_2[E^{\bullet}] - k_{-2}[E^{\circ}] \end{cases} \quad (\text{B4})$$

$$\text{with the steady-state solution:} \quad k_2[E^{\bullet}] = k_{-2}[E^{\circ}] \quad (\text{B5})$$

Thus, replacing in (B3) and rearranging:

$$\frac{[E^{\bullet}]}{[E]_{\text{T}}} = \frac{k_{-2}}{\left(1 + \frac{1}{K_{a1}[Q]}\right)k_{-2} + (1 + K_{a2}[Q])k_2} \quad (\text{B6a})$$

$$\frac{[E^{\circ}]}{[E]_{\text{T}}} = \frac{k_2}{\left(1 + \frac{1}{K_{a1}[Q]}\right)k_{-2} + (1 + K_{a2}[Q])k_2} \quad (\text{B6b})$$

Introducing expressions (B6) into system (B4):

$$\frac{1}{[E]_{\text{T}}}\left(\frac{d[E_{\circ}^{\bullet}]}{dt}\right) = -\left[k_2 + k_{-2}\left(\frac{1 + K_{a1}[Q]}{1 + K_{a2}[Q]}\right)\frac{1}{K_{a1}[Q]}\right]\frac{[E_{\circ}^{\bullet}]}{[E]_{\text{T}}} + \frac{k_{-2}}{1 + K_{a2}[Q]} \quad (\text{B7a})$$

$$\frac{1}{[E]_{\text{T}}}\left(\frac{d[E_{\circ}^{\circ}]}{dt}\right) = -\left[k_{-2} + k_2\left(\frac{1 + K_{a2}[Q]}{1 + \frac{1}{K_{a1}[Q]}}\right)\right]\frac{[E_{\circ}^{\circ}]}{[E]_{\text{T}}} + \frac{k_2}{1 + \frac{1}{K_{a1}[Q]}} \quad (\text{B7b})$$

Equations (B7) were solved to give the following time-dependent solutions:

$$\frac{[E_{\circ}^{\bullet}]}{[E]_{\text{T}}} = \frac{a}{b}[1 - \exp(-bt)] \quad (\text{B8a})$$

$$\frac{[E_{\circ}^{\circ}]}{[E]_{\text{T}}} = \left(1 - \frac{d}{c}\right)\exp(-ct) + \frac{d}{c} \quad (\text{B8b})$$

where:

$$a = \frac{k_2}{1 + \frac{1}{K_{a1}[Q]}}$$

$$b = \frac{k_{-2}(1 + K_{a1}[Q]) + k_2(1 + K_{a2}[Q])K_{a1}[Q]}{1 + K_{a1}[Q]}$$

$$c = \frac{k_{-2}(1 + K_{a1}[Q]) + k_2(1 + K_{a2}[Q])K_{a1}[Q]}{(1 + K_{a2}[Q])K_{a1}[Q]}$$

$$d = \frac{k_{-2}}{1 + K_{a2}[Q]}$$

The parameter  $b$  above was defined as  $k_{\text{tot}}$  so that

$$k_{\text{tot}} = k_2 \frac{(1 + K_{a2}[Q])K_{a1}[Q]}{1 + K_{a1}[Q]} e^{-\delta\lambda_Q U} + k_{-2} e^{(1-\delta)\lambda_Q U} \quad (\text{B9})$$

where  $\lambda_Q$  is the apparent charge of the rate limiting  $V_{\text{M}}$ -dependent reaction in Scheme B. Notice that the amine concentration dependence is associated with the forward reaction ( $k_2$ ).

This equation was used to fit the data in Fig. 1D to yield the following parameter values

$$\begin{aligned}
 k_2 &= 506 \pm 19 \text{ s}^{-1} \\
 \delta &= 0.32 \pm 0.01 \\
 \lambda_Q &= 0.41 \pm 0.01 \\
 k_{-2} &= 283 \pm 9 \text{ s}^{-1} \\
 K_{a1} &= 30,300 \pm 2,400 \text{ M}^{-1} \\
 K_{a2} &= 3,100 \pm 200 \text{ M}^{-1}
 \end{aligned}$$

The curves in Fig. 3B are the solution to this best-fitting function for Scheme B.

## ii. Steady-state charge distribution

Considering that the mobile charge is:  $q(V_M;[Q]) = zF[E^*]_{ss}$  and recalling (B6a), then:

$$q(V_M;[Q]) = \frac{q_{TOT}}{1 + \frac{1}{K_{a1}[Q]} + K_2(1 + K_{a2}[Q])\exp(-\lambda_Q U)} \quad (\text{B10})$$

where:  $q_{TOT} = zF[E]_{T}$ ;  $K_2 = k_2^0/k_{-2}^0$  where the superindex “0” indicates  $V_M = 0$ ; and  $U = zFV_M/RT$ . Addition of a term defined at the holding potential to ensure that  $q(V_h;[Q]) = 0$  leads to

$$\Delta q = \frac{q_{TOT}}{1 + \frac{1}{K_{a1}[Q]} + K_2(1 + K_{a2}[Q])e^{-\lambda_Q U}} - \frac{q_{TOT}}{1 + \frac{1}{K_{a1}[Q]} + K_2^h(1 + K_{a2}[Q])} \quad (\text{B11})$$

where  $K_2^h$  is the value of  $K_2e^{-\lambda_Q U}$  at the holding potential. This equation was used to fit data in Fig. 2A to yield the following parameter values:

$$\begin{aligned}q_{\text{TOT}} &= 15.5 \pm 0.4 \text{ fC/pF} \\K_{a1} &= 145,300 \pm 23,500 \text{ M}^{-1} \\K_2 &= 0.20 \pm 0.02 \\K_{a2} &= 15,400 \pm 2400 \text{ M}^{-1} \\\lambda_Q &= 0.64 \pm 0.03\end{aligned}$$

The curves in Fig. 4B are the solution to this best-fitting function for scheme B.

### **C. Comparison of the apparent affinity for *p*NBTEA binding calculated from transient charge movement kinetics and steady state charge distribution**

Solving for the steady state charge distribution in Scheme B leads to the conclusion that *p*NBTEA binds with an apparent affinity of 7  $\mu\text{M}$  ( $K_D = 1/K_{a1}$ ). By comparison, solving for the  $V_M$  dependence of charge kinetics with Scheme B suggested that the apparent affinity for *p*NBTEA binding was 33  $\mu\text{M}$ . We doubt the validity of this value because this Scheme B model predicts that the total amount of charge ( $q_{\text{TOT}}$ ) is a saturating function of *p*NBTEA concentration. If the binding affinity were actually 33  $\mu\text{M}$ , then we should have observed a large increase in  $q_{\text{TOT}}$  between experiments using 33 and 300  $\mu\text{M}$  concentrations of this amine. However,  $q_{\text{TOT}}$  was not significantly different at all concentrations tested, suggesting that binding affinity for *p*NBTEA is much less than 33  $\mu\text{M}$ , the lowest concentration tested. Irrespective of the true value, it is clear that this simple molecule has a high enough inhibitory affinity that *p*NBTEA might serve as a precursor structure to design high affinity  $V_M$ -dependent  $\text{Na}^+, \text{K}^+$ -ATPase blockers.



**D. Supplemental Figure 1**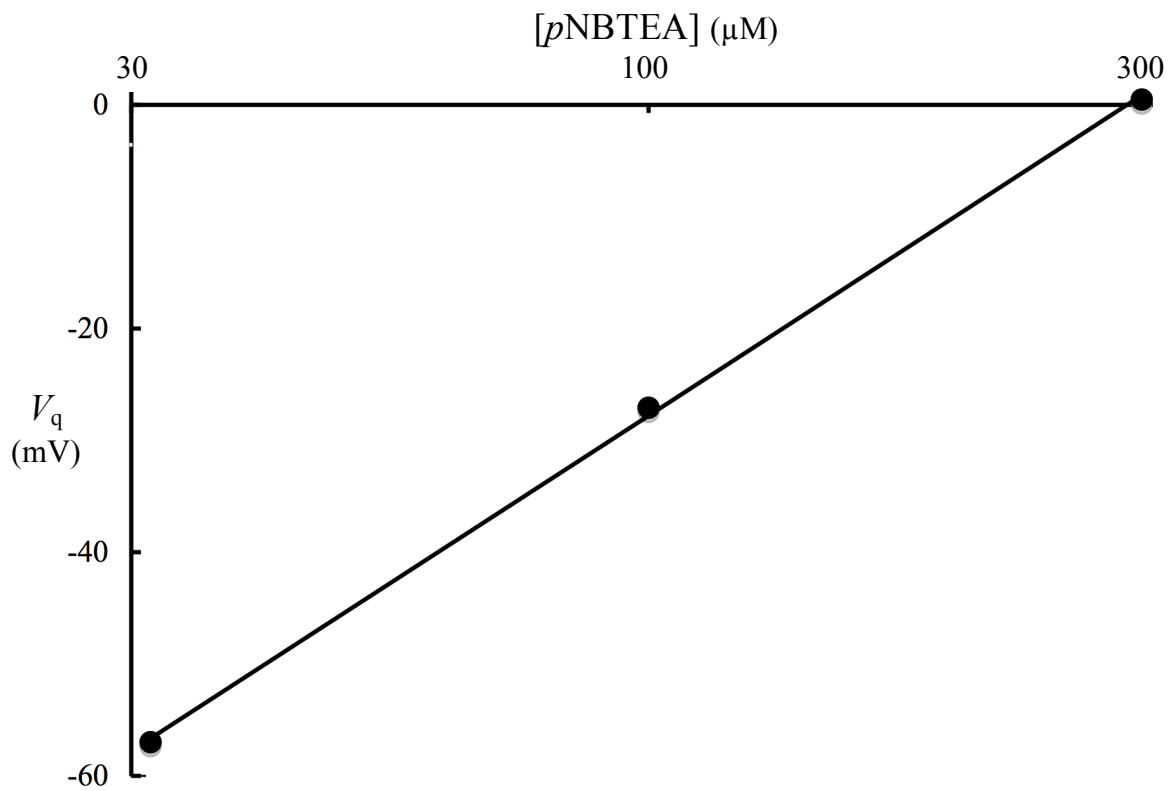

The dependence of  $V_q$  on  $p$ NBTEA concentration. Values of  $V_q$  taken from Table 1.
